# Supplementary material for: Mortality after transcatheter versus surgical aortic valve replacement: an updated meta-analysis of randomised trials
Source: Springer Nature journal article supplement (doi:10.1007/s12471-020-01378-1), 2020-03-12
Supplement: MOESM1 [file 17794674]

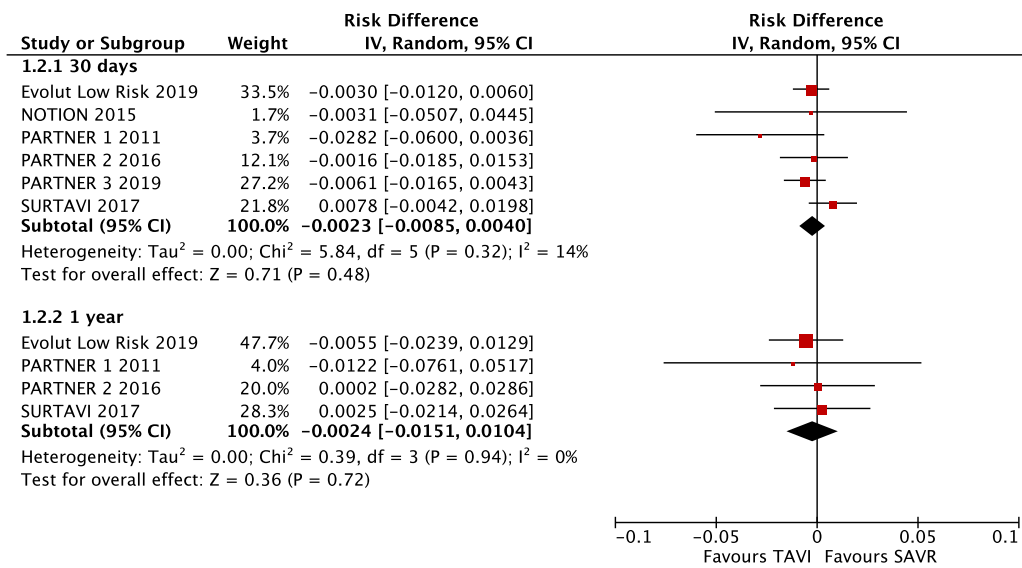

**Supplementary Fig. S1** Forrest plot of the sensitivity analysis (intention-to-treat population) of the primary end-point: risk differences in 30-day and 1-year all-cause mortality between transcatheter aortic valve implantation (TAVI) and surgical aortic valve replacement (SAVR). *CI* confidence interval; *IV* inverse variance; *NOTION* Nordic Aortic Valve Intervention; *PARTNER* Placement of Aortic Transcatheter Valves; *SURTAVI* Surgical Replacement and Transcatheter Aortic Valve Implantation

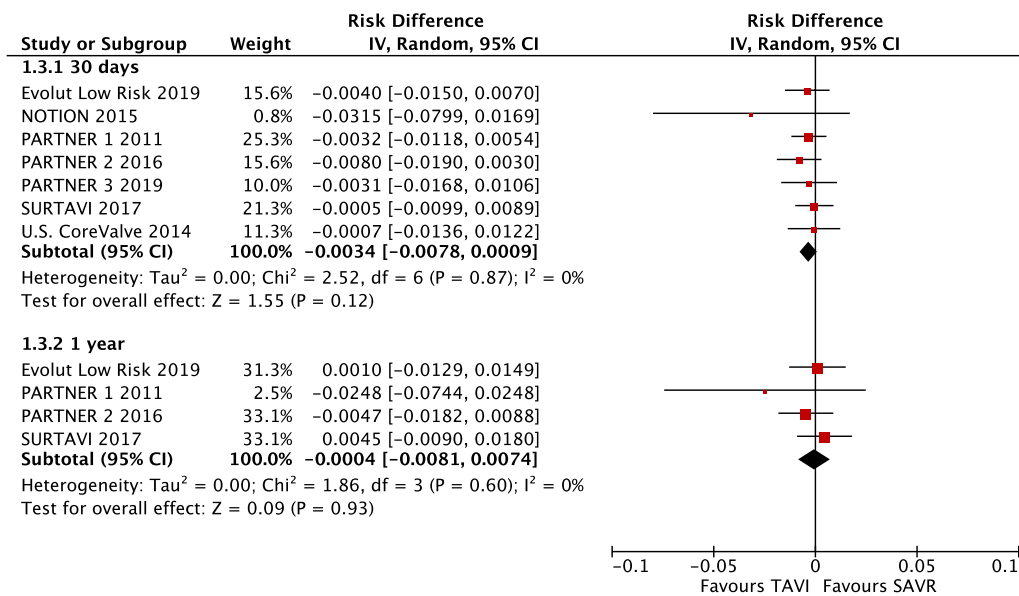

**Supplementary Fig. S2** Forrest plot of the principal analysis (as-treated population) of the secondary end-point: risk differences in 30-day and 1-year myocardial infarction between transcatheter aortic valve implantation (TAVI) and surgical aortic valve replacement (SAVR). *CI* confidence interval; *IV* inverse variance; *NOTION* Nordic Aortic Valve Intervention; *PARTNER* Placement of Aortic Transcatheter Valves; *SURTAVI* Surgical Replacement and Transcatheter Aortic Valve Implantation

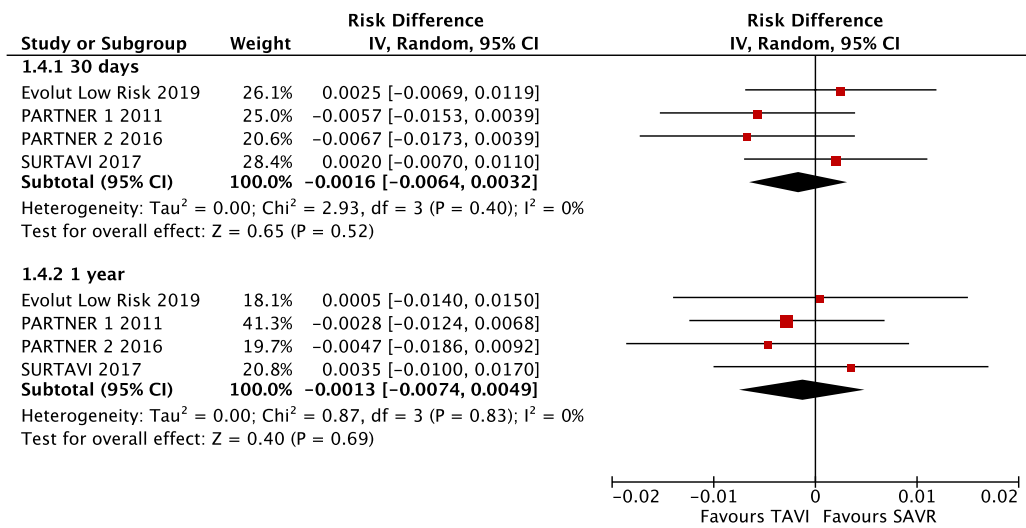

**Supplementary Fig. S3** Forrest plot of the sensitivity analysis (intention-to-treat population) of the secondary end-point: risk differences in 30-day and 1-year myocardial infarction between transcatheter aortic valve implantation (TAVI) and surgical aortic valve replacement (SAVR). *CI* confidence interval; *IV* inverse variance; *PARTNER* Placement of Aortic Transcatheter Valves; *SURTAVI* Surgical Replacement and Transcatheter Aortic Valve Implantation

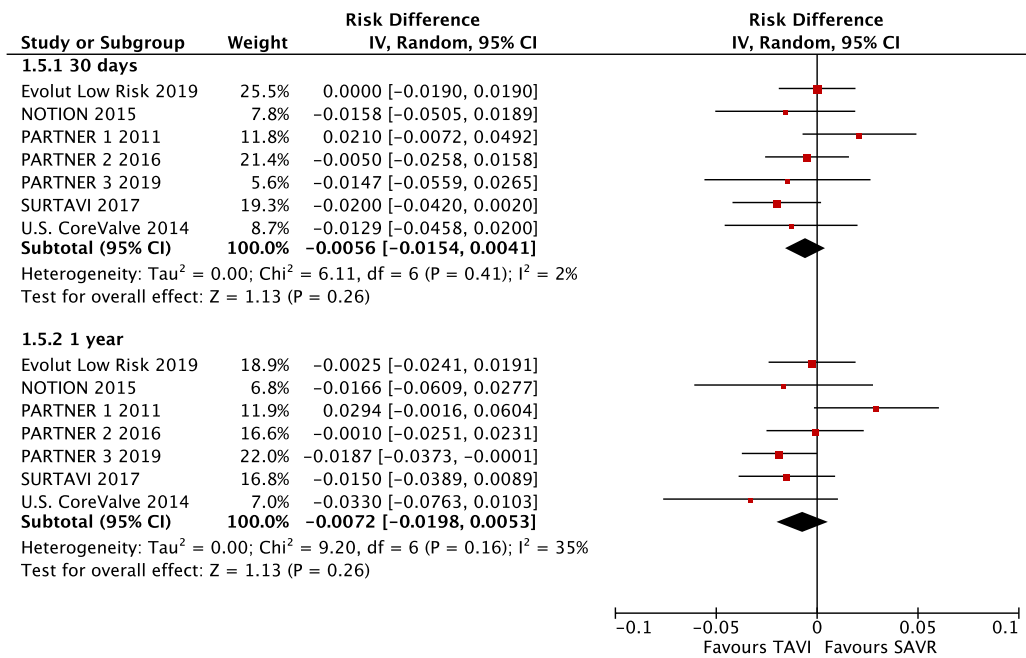

**Supplementary Fig. S4** Forrest plot of the principal analysis (as-treated population) of the secondary end-point: risk differences in 30-day and 1-year stroke between transcatheter aortic valve implantation (TAVI) and surgical aortic valve replacement (SAVR). *CI* confidence interval; *IV* inverse variance; *NOTION* Nordic Aortic Valve Intervention; *PARTNER* Placement of Aortic Transcatheter Valves; *SURTAVI* Surgical Replacement and Transcatheter Aortic Valve Implantation

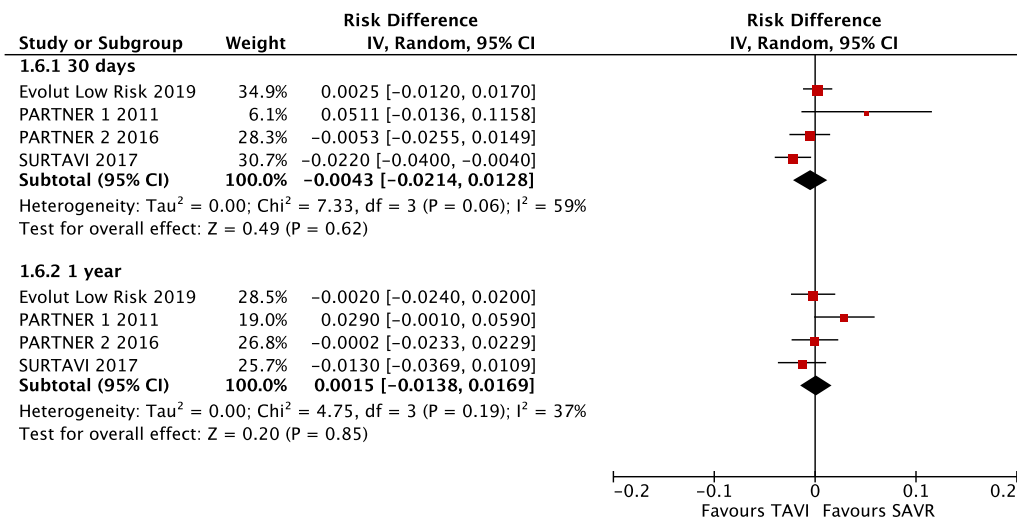

**Supplementary Fig. S5** Forrest plot of the sensitivity analysis (intention-to-treat population) of the secondary end-point: risk differences in 30-day and 1-year stroke between transcatheter aortic valve implantation (TAVI) and surgical aortic valve replacement (SAVR). *CI* confidence interval; *IV* inverse variance; *NOTION* Nordic Aortic Valve Intervention; *PARTNER* Placement of Aortic Transcatheter Valves; *SURTAVI* Surgical Replacement and Transcatheter Aortic Valve Implantation

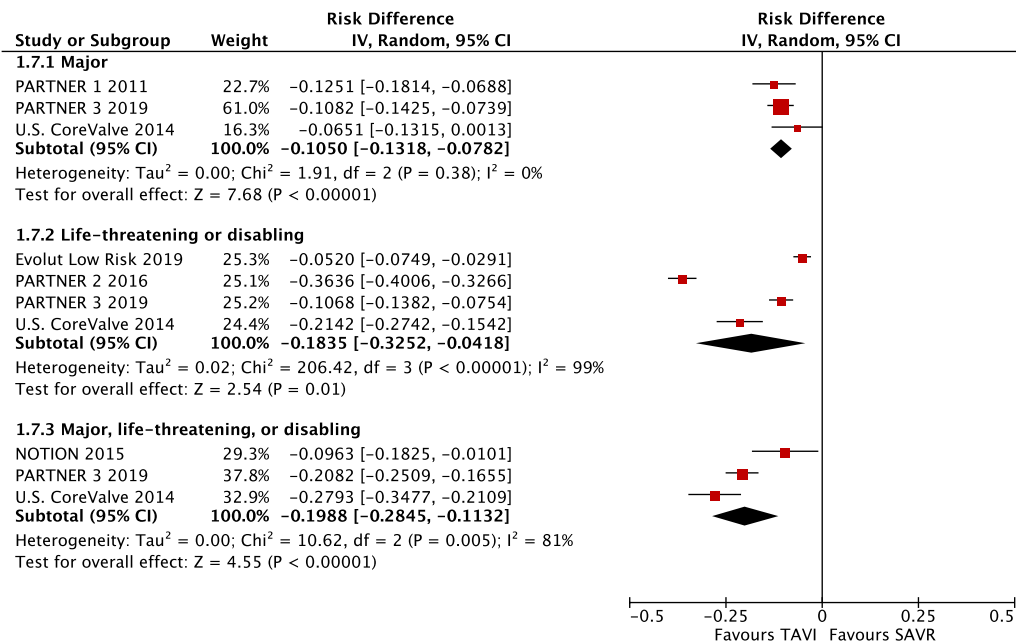

**Supplementary Fig. S6** Forrest plot of the principal analysis (as-treated population) of the secondary end-point: risk differences in 30-day bleeding complications between transcatheter aortic valve implantation (TAVI) and surgical aortic valve replacement (SAVR). *CI* confidence interval; *IV* inverse variance; *NOTION* Nordic Aortic Valve Intervention; *PARTNER* Placement of Aortic Transcatheter Valves

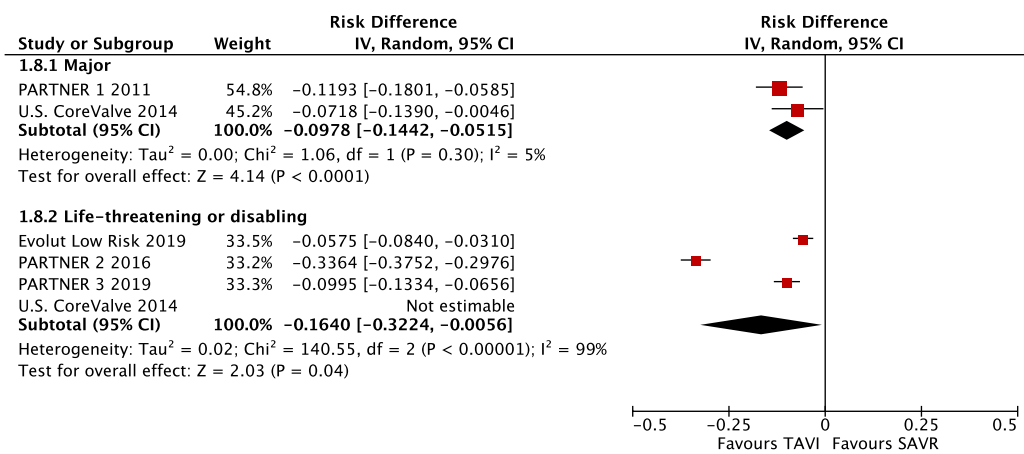

**Supplementary Fig. S7** Forrest plot of the principal analysis (as-treated population) of the secondary end-point: risk differences in 1-year bleeding complications between transcatheter aortic valve implantation (TAVI) and surgical aortic valve replacement (SAVR). *CI* confidence interval; *IV* inverse variance; *NOTION* Nordic Aortic Valve Intervention; *PARTNER* Placement of Aortic Transcatheter Valves; *SURTA* Surgical Replacement and Transcatheter Aortic Valve Implantation

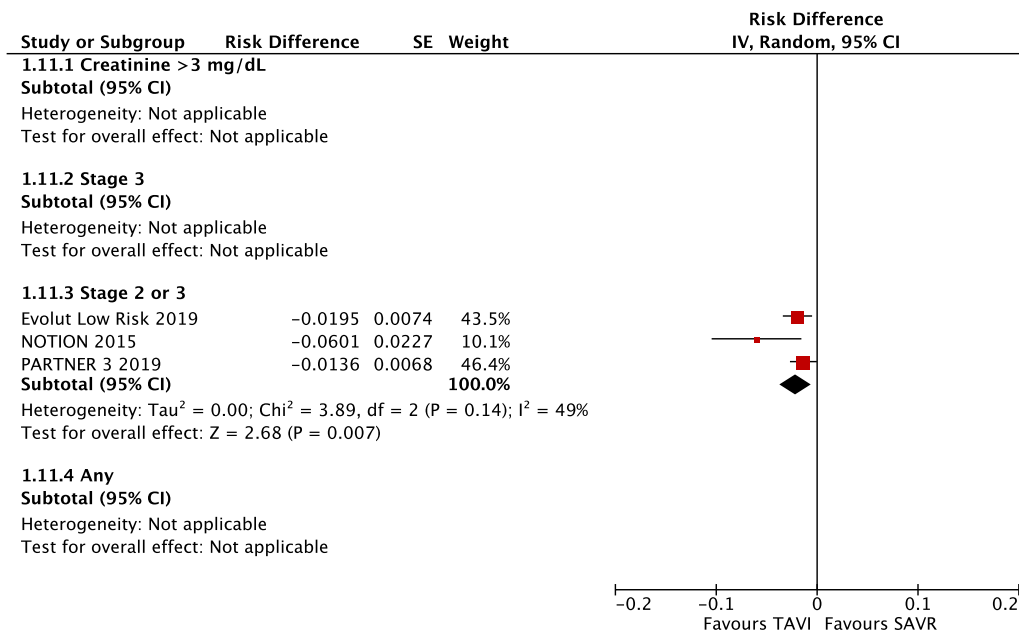

**Supplementary Fig. S8** Forrest plot of the principal analysis (as-treated population) of the secondary end-point: risk differences in 30-day acute kidney injury between transcatheter aortic valve implantation (TAVI) and surgical aortic valve replacement (SAVR). *CI* confidence interval; *IV* inverse variance; *NOTION* Nordic Aortic Valve Intervention; *PARTNER* Placement of Aortic Transcatheter Valves; *SURTAVI* Surgical Replacement and Transcatheter Aortic Valve Implantation



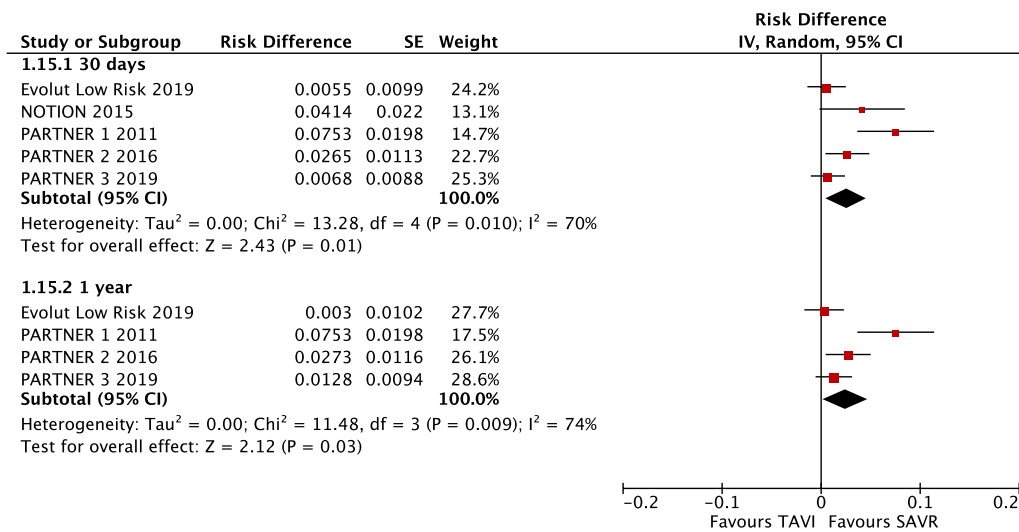

**Supplementary Fig. S9** Forrest plot of the principal analysis (as-treated population) of the secondary end-point: risk differences in 30-day and 1-year major vascular complications between transcatheter aortic valve implantation (TAVI) and surgical aortic valve replacement (SAVR). *CI* confidence interval; *IV* inverse variance; *NOTION* Nordic Aortic Valve Intervention; *PARTNER* Placement of Aortic Transcatheter Valves; *SURTAVI* Surgical Replacement and Transcatheter Aortic Valve Implantation

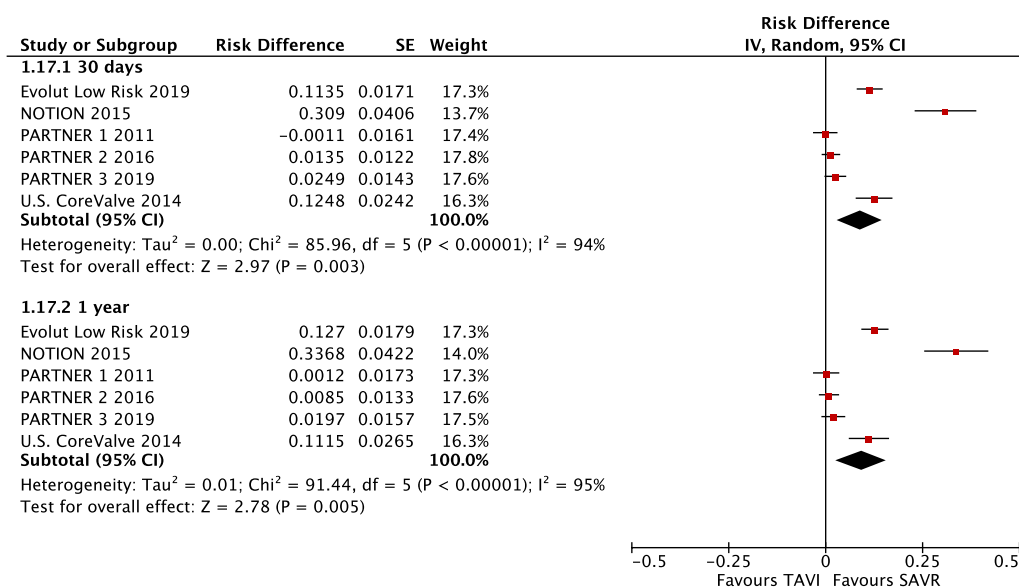

**Supplementary Fig. S10** Forrest plot of the principal analysis (as-treated population) of the secondary end-point: risk differences in 30-day and 1-year new permanent pacemaker implantation between transcatheter aortic valve implantation (TAVI) and surgical aortic valve replacement (SAVR). *CI* confidence interval; *IV* inverse variance; *NOTION* Nordic Aortic Valve Intervention; *PARTNER* Placement of Aortic Transcatheter Valves
