# Supplementary material for: Mortality after transcatheter versus surgical aortic valve replacement: an updated meta-analysis of randomised trials
Source: Neth Heart J. 2020 Mar 12;28(6):320–33. doi: 10.1007/s12471-020-01378-1 (PMC7270388; doi:10.1007/s12471-020-01378-1)
Supplement: Supplementary file 2 — Supplementary Table S1 [file 12471_2020_1378_MOESM2_ESM.pdf]

**Supplementary Table S1** Secondary end points (myocardial infarction, stroke, bleeding complications, acute kidney injury, vascular complications, and new permanent pacemaker implantation)

| Study                             | Myocardial infarction                      |      |            |      |        |      |            |      |                                                      |      |             |      |             |      |             |      |
|-----------------------------------|--------------------------------------------|------|------------|------|--------|------|------------|------|------------------------------------------------------|------|-------------|------|-------------|------|-------------|------|
|                                   | Principal analysis (as-treated population) |      |            |      |        |      |            |      | Sensitivity analysis (intention-to-treat population) |      |             |      |             |      |             |      |
|                                   | 30 days                                    |      |            |      | 1 year |      |            |      | 30 days                                              |      |             |      | 1 year      |      |             |      |
|                                   | Number                                     |      | Percentage |      | Number |      | Percentage |      | Number                                               |      | Percentage  |      | Number      |      | Percentage  |      |
|                                   | TAVI                                       | SAVR | TAVI       | SAVR | TAVI   | SAVR | TAVI       | SAVR | TAVI                                                 | SAVR | TAVI        | SAVR | TAVI        | SAVR | TAVI        | SAVR |
| Evolut Low Risk 2019 <sup>5</sup> | 7                                          | 9    | 1.0        | 1.3  | 28     | 24   | 3.9        | 3.5  | 7                                                    | 4    | 1.0         | 0.5  | 12          | 12   | 1.6         | 1.6  |
| NOTION 2015 <sup>8</sup>          | 4                                          | 8    | 2.8        | 6.0  | 5      | 8    | 3.5        | 6.0  | Unavailable                                          |      | Unavailable |      | Unavailable |      | Unavailable |      |
| PARTNER 1 2011 <sup>9</sup>       | 0                                          | 1    | 0.0        | 0.3  | 1      | 1    | 0.3        | 0.3  | 0                                                    | 2    | 0.0         | 0.6  | 1           | 2    | 0.3         | 0.6  |
| PARTNER 2 2016 <sup>10</sup>      | 11                                         | 18   | 1.1        | 1.9  | 23     | 28   | 2.3        | 3.0  | 12                                                   | 19   | 1.2         | 1.9  | 24          | 29   | 2.4         | 2.8  |
| PARTNER 3 2019 <sup>6</sup>       | 5                                          | 6    | 1.0        | 1.3  | 6      | 10   | 1.2        | 2.2  | Unavailable                                          |      | Unavailable |      | Unavailable |      | Unavailable |      |
| SURTAVI 2017 <sup>11</sup>        | 8                                          | 8    | 0.9        | 1.0  | 17     | 13   | 2.0        | 1.6  | 8                                                    | 6    | 0.9         | 0.7  | 18          | 15   | 2.0         | 1.7  |
| U.S. CoreValve 2014 <sup>12</sup> | 3                                          | 3    | 0.8        | 0.8  | 7      | 5    | 1.8        | 1.4  | Unavailable                                          |      | Unavailable |      | Unavailable |      | Unavailable |      |

*NOTION* Nordic Aortic Valve Intervention; *PARTNER* Placement of Aortic Transcatheter Valves; *SAVR* surgical aortic valve replacement; *SURTAVI* Surgical Replacement and Transcatheter Aortic Valve Implantation; *TAVI* transcatheter aortic valve implantation

Supplementary Table S1 Continued

| Study                             | Stroke                                     |      |            |      |        |      |            |      |                                                      |      |             |      |             |      |             |      |
|-----------------------------------|--------------------------------------------|------|------------|------|--------|------|------------|------|------------------------------------------------------|------|-------------|------|-------------|------|-------------|------|
|                                   | Principal analysis (as-treated population) |      |            |      |        |      |            |      | Sensitivity analysis (intention-to-treat population) |      |             |      |             |      |             |      |
|                                   | 30 days                                    |      |            |      | 1 year |      |            |      | 30 days                                              |      |             |      | 1 year      |      |             |      |
|                                   | Number                                     |      | Percentage |      | Number |      | Percentage |      | Number                                               |      | Percentage  |      | Number      |      | Percentage  |      |
|                                   | TAVI                                       | SAVR | TAVI       | SAVR | TAVI   | SAVR | TAVI       | SAVR | TAVI                                                 | SAVR | TAVI        | SAVR | TAVI        | SAVR | TAVI        | SAVR |
| Evolut Low Risk 2019 <sup>5</sup> | 25                                         | 23   | 3.4        | 3.4  | 30     | 29   | 4.1        | 4.3  | 15                                                   | 14   | 2.0         | 1.9  | 29          | 31   | 4.0         | 4.2  |
| NOTION 2015 <sup>8</sup>          | 2                                          | 4    | 1.4        | 3.0  | 4      | 6    | 2.8        | 4.5  | Unavailable                                          |      | Unavailable |      | Unavailable |      | Unavailable |      |
| PARTNER 1 2011 <sup>9</sup>       | 16                                         | 8    | 4.7        | 2.6  | 20     | 9    | 5.8        | 2.9  | 16                                                   | 8    | 4.6         | 2.3  | 20          | 10   | 5.7         | 2.8  |
| PARTNER 2 2016 <sup>10</sup>      | 55                                         | 57   | 5.5        | 6.0  | 78     | 75   | 7.8        | 7.9  | 55                                                   | 61   | 5.4         | 6.0  | 78          | 79   | 7.7         | 7.7  |
| PARTNER 3 2019 <sup>6</sup>       | 3                                          | 11   | 0.6        | 2.4  | 6      | 14   | 1.2        | 3.1  | Unavailable                                          |      | Unavailable |      | Unavailable |      | Unavailable |      |
| SURTAVI 2017 <sup>11</sup>        | 29                                         | 45   | 3.4        | 5.7  | 47     | 55   | 5.4        | 6.9  | 23                                                   | 42   | 2.6         | 4.8  | 48          | 59   | 5.5         | 6.8  |
| U.S. CoreValve 2014 <sup>12</sup> | 19                                         | 22   | 4.9        | 6.2  | 33     | 42   | 8.5        | 11.8 | Unavailable                                          |      | Unavailable |      | Unavailable |      | Unavailable |      |

Supplementary Table S1 Continued

[illegible]

Supplementary Table S1 Continued

| Study                             | Acute kidney injury                        |             |      |             |        |             |      |             |                                                      |             |      |             |        |             |      |             |      |
|-----------------------------------|--------------------------------------------|-------------|------|-------------|--------|-------------|------|-------------|------------------------------------------------------|-------------|------|-------------|--------|-------------|------|-------------|------|
|                                   |                                            |             |      |             |        |             |      |             |                                                      |             |      |             |        |             |      |             |      |
|                                   |                                            |             |      |             |        |             |      |             |                                                      |             |      |             |        |             |      |             |      |
|                                   | Principal analysis (as-treated population) |             |      |             |        |             |      |             | Sensitivity analysis (intention-to-treat population) |             |      |             |        |             |      |             |      |
|                                   | 30 days                                    |             |      |             | 1 year |             |      |             | 30 days                                              |             |      |             | 1 year |             |      |             |      |
| Number                            |                                            | Percentage  |      | Number      |        | Percentage  |      | Number      |                                                      | Percentage  |      | Number      |        | Percentage  |      |             |      |
| TAVI                              | SAVR                                       | TAVI        | SAVR | TAVI        | SAVR   | TAVI        | SAVR | TAVI        | SAVR                                                 | TAVI        | SAVR | TAVI        | SAVR   | TAVI        | SAVR | TAVI        | SAVR |
| Evolut Low Risk 2019 <sup>5</sup> | Stage 2 or 3                               | 7           | 19   | 1.0         | 2.8    | 7           | 19   | 1.0         | 2.8                                                  | Unavailable |      | Unavailable |        | Unavailable |      | Unavailable |      |
| NOTION 2015 <sup>8</sup>          | Stage 2 or 3                               | 1           | 9    | 0.7         | 6.7    | Unavailable |      | Unavailable |                                                      | Unavailable |      | Unavailable |        | Unavailable |      | Unavailable |      |
| PARTNER 1 2011 <sup>9</sup>       | Creatinine >3 mg/dL                        | 3           | 3    | 0.9         | 1.0    | 10          | 5    | 2.9         | 1.6                                                  | 4           | 4    | 1.1         | 1.1    | 12          | 8    | 3.4         | 2.3  |
| PARTNER 2 2016 <sup>10</sup>      | Stage 3                                    | 12          | 31   | 1.2         | 3.3    | 31          | 48   | 3.1         | 5.1                                                  | 13          | 31   | 1.3         | 3.0    | 32          | 48   | 3.2         | 4.7  |
| PARTNER 3 2019 <sup>6</sup>       | Stage 3                                    | 2           | 3    | 0.4         | 0.7    | Unavailable |      | Unavailable |                                                      | Unavailable |      | Unavailable |        | Unavailable |      | Unavailable |      |
|                                   | Stage 2 or 3                               | 2           | 8    | 0.4         | 1.8    | Unavailable |      | Unavailable |                                                      | Unavailable |      | Unavailable |        | Unavailable |      | Unavailable |      |
| SURTAVI 2017 <sup>11</sup>        | Unavailable                                | Unavailable |      | Unavailable |        | Unavailable |      | Unavailable |                                                      | Unavailable |      | Unavailable |        | Unavailable |      | Unavailable |      |
| U.S. CoreValve 2014 <sup>12</sup> | Any                                        | 23          | 54   | 5.9         | 15.1   | 23          | 54   | 5.9         | 15.1                                                 | Unavailable |      | Unavailable |        | Unavailable |      | Unavailable |      |

Supplementary Table S1 Continued

| Study                             | Major Vascular complications               |      |             |      |             |      |             |      |                                                      |      |             |      |             |      |             |      |
|-----------------------------------|--------------------------------------------|------|-------------|------|-------------|------|-------------|------|------------------------------------------------------|------|-------------|------|-------------|------|-------------|------|
|                                   | Principal analysis (as-treated population) |      |             |      |             |      |             |      | Sensitivity analysis (intention-to-treat population) |      |             |      |             |      |             |      |
|                                   | 30 days                                    |      |             |      | 1 year      |      |             |      | 30 days                                              |      |             |      | 1 year      |      |             |      |
|                                   | Number                                     |      | Percentage  |      | Number      |      | Percentage  |      | Number                                               |      | Percentage  |      | Number      |      | Percentage  |      |
|                                   | TAVI                                       | SAVR | TAVI        | SAVR | TAVI        | SAVR | TAVI        | SAVR | TAVI                                                 | SAVR | TAVI        | SAVR | TAVI        | SAVR | TAVI        | SAVR |
| Evolut Low Risk 2019 <sup>5</sup> | 28                                         | 22   | 3.9         | 3.2  | 28          | 24   | 3.9         | 3.5  | Unavailable                                          |      | Unavailable |      | Unavailable |      | Unavailable |      |
| NOTION 2015 <sup>8</sup>          | 8                                          | 2    | 5.6         | 1.5  | Unavailable |      | Unavailable |      | Unavailable                                          |      | Unavailable |      | Unavailable |      | Unavailable |      |
| PARTNER 1 2011 <sup>9</sup>       | 38                                         | 11   | 11.0        | 3.5  | 38          | 11   | 11.0        | 3.5  | 38                                                   | 11   | 10.9        | 3.1  | 39          | 12   | 11.2        | 3.4  |
| PARTNER 2 2016 <sup>10</sup>      | 80                                         | 51   | 8.0         | 5.4  | 84          | 54   | 8.5         | 5.7  | 80                                                   | 51   | 7.9         | 5.0  | 84          | 54   | 8.3         | 5.3  |
| PARTNER 3 2019 <sup>6</sup>       | 11                                         | 7    | 2.2         | 1.5  | 14          | 7    | 2.8         | 1.5  | Unavailable                                          |      | Unavailable |      | Unavailable |      | Unavailable |      |
| SURTA VI 2017 <sup>11</sup>       | Unavailable                                |      | Unavailable |      | Unavailable |      | Unavailable |      | Unavailable                                          |      | Unavailable |      | Unavailable |      | Unavailable |      |
| U.S. CoreValve 2014 <sup>12</sup> | Unavailable                                |      | Unavailable |      | Unavailable |      | Unavailable |      | Unavailable                                          |      | Unavailable |      | Unavailable |      | Unavailable |      |
